# Supplementary material for: Strain rate patterns from dense GPS networks
Source: Copernicus journal article supplement (doi:10.5194/nhess-9-1177-2009), 2009-07-17
Supplement: Supplementary file 1 [file nhess-9-1177-2009-supplement.zip]

**Table 1.** Common sites in SOPAC and SCEC datasets that were used to calculate the three parameter transformation in order to rotate SOPAC data into the North America Fixed Reference Frame used by SCEC. The table contains the differences of the SOPAC vectors after the transformation and the SCEC vectors and relative errors. The average residual for the north component is  $(0.6 \pm 0.98)mm/yr$  with  $rms = 0.78mm/yr$ . For the east component the average residual is  $(0.73 \pm 0.96)mm/yr$  with  $rms = 0.87mm/yr$ .

| Site | Lon [° E] | Lat [° N] | Res <sub>N</sub> [mm/yr] | $\sigma_N$ [mm/yr] | Res <sub>E</sub> [mm/yr] | $\sigma_E$ [mm/yr] |
|------|-----------|-----------|--------------------------|--------------------|--------------------------|--------------------|
| ALGO | -78.07    | 45.96     | 0.24                     | 0.45               | 1.05                     | 0.46               |
| AOA1 | -118.83   | 34.16     | -0.08                    | 0.89               | -0.66                    | 0.86               |
| AVRY | -117.15   | 34.47     | 0.28                     | 1.03               | 0.65                     | 1.01               |
| AZU1 | -117.90   | 34.13     | 0.11                     | 0.93               | -1.20                    | 0.90               |
| BKMS | -118.09   | 33.96     | -0.25                    | 1.01               | -0.95                    | 0.99               |
| BLYT | -114.71   | 33.61     | -0.33                    | 0.81               | 0.61                     | 0.80               |
| BRAN | -118.28   | 34.18     | -0.62                    | 0.89               | -0.48                    | 0.86               |
| CAT1 | -118.48   | 33.45     | 0.50                     | 0.91               | -0.34                    | 0.88               |
| CBHS | -118.63   | 34.14     | -0.36                    | 1.08               | -0.04                    | 1.06               |
| CCCS | -117.86   | 33.86     | -1.48                    | 1.07               | 0.76                     | 1.04               |
| CHIL | -118.03   | 34.33     | 0.38                     | 0.88               | -0.66                    | 0.84               |
| CHMS | -117.83   | 34.64     | 0.40                     | 1.15               | -1.55                    | 1.13               |
| CHUR | -94.09    | 58.76     | 0.81                     | 0.56               | -0.17                    | 0.57               |
| CIC1 | -116.67   | 31.87     | -0.82                    | 1.08               | 0.09                     | 1.07               |
| CIT1 | -118.13   | 34.14     | -0.11                    | 0.87               | -1.27                    | 0.84               |
| CLAR | -117.71   | 34.11     | 0.17                     | 0.89               | 0.63                     | 0.86               |
| CMP9 | -118.41   | 34.35     | 0.46                     | 0.90               | -1.12                    | 0.87               |
| CRFP | -117.10   | 34.04     | -0.09                    | 0.86               | -1.07                    | 0.83               |
| CRHS | -118.27   | 33.82     | 0.21                     | 1.14               | 1.25                     | 1.12               |
| CRRS | -115.73   | 33.07     | -1.17                    | 1.03               | -0.27                    | 1.02               |
| CSDH | -118.26   | 33.86     | -0.99                    | 1.02               | 0.69                     | 0.99               |
| CSN1 | -118.52   | 34.25     | -1.18                    | 0.93               | -0.68                    | 0.90               |
| DHLG | -115.79   | 33.39     | 0.07                     | 0.88               | 0.09                     | 0.86               |
| DSHS | -118.35   | 34.02     | 0.70                     | 1.11               | 0.97                     | 1.09               |
| DVPB | -117.86   | 34.41     | -0.26                    | 1.14               | -1.31                    | 1.11               |
| DYHS | -118.13   | 33.94     | -0.06                    | 1.01               | -0.98                    | 0.99               |
| ECCO | -118.33   | 33.89     | -0.18                    | 1.12               | 0.15                     | 1.09               |
| ELSC | -118.21   | 34.03     | -1.40                    | 1.13               | -1.39                    | 1.11               |
| FHFF | -118.61   | 34.51     | 0.94                     | 1.19               | 1.01                     | 1.17               |
| FVPK | -117.94   | 33.66     | 0.95                     | 1.02               | 1.44                     | 0.99               |
| FXHS | -118.36   | 34.08     | -1.79                    | 1.13               | 0.26                     | 1.10               |
| FZHS | -118.89   | 34.80     | 0.19                     | 1.03               | -0.05                    | 1.01               |
| GODE | -76.83    | 39.02     | -0.05                    | 0.52               | 1.01                     | 0.53               |
| GOL2 | -116.89   | 35.43     | -1.36                    | 0.80               | -0.89                    | 0.77               |
| GOLD | -116.89   | 35.43     | -0.92                    | 1.42               | 0.34                     | 1.54               |
| HARV | -120.68   | 34.47     | -1.77                    | 0.90               | -0.65                    | 0.85               |
| HOLC | -117.85   | 34.46     | 0.30                     | 0.88               | 0.15                     | 0.85               |
| ISLK | -118.47   | 35.66     | -1.10                    | 1.14               | -0.86                    | 1.11               |
| KELY | -50.94    | 66.99     | 0.38                     | 0.65               | 1.90                     | 0.65               |
| LAPC | -118.57   | 34.18     | -0.54                    | 1.15               | 0.47                     | 1.13               |
| LEEP | -118.32   | 34.13     | -0.02                    | 0.89               | -0.35                    | 0.86               |
| LFRS | -118.41   | 34.10     | -0.30                    | 1.11               | -1.41                    | 1.08               |
| LINJ | -118.14   | 34.66     | 0.52                     | 0.97               | 0.25                     | 0.95               |
| LLAS | -117.84   | 34.59     | -0.02                    | 1.12               | -1.58                    | 1.10               |
| LONG | -118.00   | 34.11     | 0.38                     | 0.90               | -0.78                    | 0.87               |
| LORS | -117.75   | 34.13     | 0.01                     | 1.12               | 0.02                     | 1.10               |
| LVMS | -119.10   | 34.73     | -0.95                    | 1.17               | -0.27                    | 1.14               |
| MDO1 | -104.02   | 30.68     | -0.54                    | 0.62               | 0.56                     | 0.64               |

| Site | Lon [° E] | Lat [° N] | Res <sub>N</sub> [mm/yr] | $\sigma_N$ [mm/yr] | Res <sub>E</sub> [mm/yr] | $\sigma_E$ [mm/yr] |
|------|-----------|-----------|--------------------------|--------------------|--------------------------|--------------------|
| MLFP | -117.32   | 33.92     | 0.42                     | 1.05               | 0.41                     | 1.02               |
| MONP | -116.42   | 32.89     | 0.04                     | 0.81               | 0.14                     | 0.79               |
| MPWD | -118.88   | 34.30     | -0.54                    | 1.13               | -0.45                    | 1.11               |
| MVFD | -116.53   | 33.21     | 0.75                     | 1.10               | 0.82                     | 1.08               |
| NLIB | -91.57    | 41.77     | 0.08                     | 0.49               | 1.23                     | 0.51               |
| NOPK | -118.35   | 33.98     | 0.06                     | 1.16               | -0.53                    | 1.14               |
| OAT2 | -118.60   | 34.33     | -1.31                    | 0.84               | 0.37                     | 0.81               |
| OVLS | -119.14   | 34.33     | 0.29                     | 1.14               | -0.10                    | 1.12               |
| OXYC | -118.21   | 34.13     | -0.35                    | 1.17               | -0.53                    | 1.15               |
| PHLB | -117.69   | 34.93     | 0.35                     | 1.20               | -1.19                    | 1.18               |
| PIE1 | -108.12   | 34.30     | -1.37                    | 0.61               | 1.14                     | 0.61               |
| PIN1 | -116.46   | 33.61     | 0.91                     | 1.03               | -0.19                    | 1.05               |
| PIN2 | -116.46   | 33.61     | 0.66                     | 1.08               | -0.99                    | 1.11               |
| PMHS | -118.15   | 33.90     | 0.05                     | 1.01               | 0.67                     | 0.99               |
| PMOB | -116.86   | 33.36     | -0.16                    | 1.02               | 0.16                     | 1.00               |
| PPBF | -117.18   | 33.84     | -0.63                    | 1.04               | 0.58                     | 1.02               |
| PVHS | -118.37   | 33.78     | -0.77                    | 1.14               | 0.89                     | 1.12               |
| PVRS | -118.32   | 33.77     | -0.18                    | 1.12               | -0.96                    | 1.08               |
| QHTP | -118.24   | 34.63     | -0.42                    | 1.17               | -1.44                    | 1.15               |
| RHCL | -118.03   | 34.02     | 0.38                     | 1.09               | 0.62                     | 1.07               |
| ROCH | -116.61   | 33.61     | 0.08                     | 1.55               | 0.19                     | 1.61               |
| ROCK | -118.68   | 34.24     | 1.00                     | 0.91               | -0.85                    | 0.88               |
| RSTP | -118.19   | 34.88     | -0.36                    | 1.14               | -0.73                    | 1.11               |
| RTHS | -117.35   | 34.09     | -0.82                    | 0.99               | -0.96                    | 0.96               |
| RYAN | -116.65   | 36.32     | -1.21                    | 1.03               | -0.01                    | 1.02               |
| SCIA | -117.39   | 34.61     | 1.33                     | 1.04               | -2.20                    | 1.02               |
| SCIP | -118.49   | 32.91     | -0.29                    | 0.99               | 0.02                     | 0.97               |
| SGHS | -118.11   | 34.09     | -0.25                    | 1.21               | 1.62                     | 1.19               |
| SIO3 | -117.25   | 32.86     | -0.53                    | 0.76               | -0.07                    | 0.73               |
| SNHS | -117.93   | 33.93     | 0.17                     | 1.11               | -0.48                    | 1.09               |
| SNII | -119.52   | 33.25     | -0.22                    | 0.94               | -0.29                    | 0.91               |
| SPK1 | -118.65   | 34.06     | 0.16                     | 0.90               | -0.19                    | 0.87               |
| SPMS | -117.85   | 33.99     | 1.11                     | 1.01               | 0.47                     | 0.99               |
| SPMX | -115.47   | 31.05     | 0.32                     | 1.05               | 0.85                     | 1.04               |
| STJO | -52.68    | 47.60     | -0.92                    | 0.62               | 1.14                     | 0.62               |
| TABL | -117.68   | 34.38     | -0.22                    | 0.89               | -0.98                    | 0.86               |
| TORP | -118.33   | 33.80     | 0.57                     | 0.94               | -0.18                    | 0.91               |
| TOST | -118.84   | 34.25     | -1.66                    | 1.13               | -0.63                    | 1.10               |
| TRAK | -117.80   | 33.62     | 0.21                     | 0.88               | 1.17                     | 0.85               |
| TROY | -116.53   | 34.84     | -1.58                    | 1.04               | 1.21                     | 1.01               |
| UCLP | -118.44   | 34.07     | 0.43                     | 0.89               | -0.12                    | 0.86               |
| USC1 | -118.29   | 34.02     | 1.47                     | 0.88               | -1.20                    | 0.85               |
| USGC | -116.09   | 33.03     | -0.69                    | 1.12               | 1.22                     | 1.10               |
| VNCX | -118.48   | 34.29     | -1.78                    | 1.08               | -0.46                    | 1.06               |
| VNDP | -120.62   | 34.56     | -0.52                    | 0.89               | 0.30                     | 0.84               |
| VNPS | -118.12   | 34.50     | -0.29                    | 1.15               | -1.31                    | 1.12               |
| VTIS | -118.29   | 33.71     | -0.05                    | 1.05               | -0.16                    | 1.02               |
| VYAS | -117.99   | 34.03     | 2.23                     | 1.01               | 1.40                     | 0.99               |
| WES2 | -71.49    | 42.61     | -0.15                    | 0.49               | 0.54                     | 0.50               |
| WKPK | -118.74   | 34.57     | -0.55                    | 1.07               | -1.57                    | 1.05               |
| WRHS | -118.43   | 33.96     | -0.74                    | 1.18               | 0.04                     | 1.16               |
| YELL | -114.48   | 62.48     | 1.64                     | 0.58               | -1.02                    | 0.59               |
